# Supplementary material for: Influence of SPION Surface Coating on Magnetic Properties and Theranostic Profile
Source: MDPI journal article supplement (doi:10.3390/molecules29081824), 2024-04-17
Supplement: s1 [file s1]

## Supplementary Materials

### Influence of SPIONs Surface Coating on Magnetic Properties and Theranostic Profile

Vital Cruvinel Ferreira-Filho <sup>1</sup>, Beatriz Morais <sup>1</sup>, Bruno J. C. Vieira <sup>1</sup>, João Carlos Waerenborgh <sup>1</sup>, Maria João Carmezim <sup>2,3</sup>, Csilla Noémi Tóth <sup>4</sup>, Sandra Mème <sup>4</sup>, Sara Lacerda <sup>4</sup>, Daniel Jaque <sup>5</sup>, Célia T. Sousa <sup>6</sup>, Maria Paula Cabral Campello <sup>1,\*</sup> and Laura C. J. Pereira <sup>1,\*</sup>

<sup>1</sup> Centro de Ciências e Tecnologias Nucleares, DECN, Instituto Superior Técnico, Universidade de Lisboa, E.N. 10, km 139,7, 2695-066 Bobadela LRS, Portugal; vital.filho@ctn.tecnico.ulisboa.pt (VFF); beatriz.morais@ctn.tecnico.ulisboa (BM); brunovieira@ctn.tecnico.ulisboa.pt (B.J.C.V.); jcarlos@ctn.tecnico.ulisboa.pt (J.C.W.); pcampello@ctn.tecnico.ulisboa.pt (MPCC); lpereira@ctn.tecnico.ulisboa.pt (L.C.J.P.).

<sup>2</sup> Centro de Química Estrutural-CQE, DEQ, Instituto Superior Técnico, Universidade de Lisboa, Av. Rovisco Pais, 1049-001 Lisboa, Portugal; maria.carmezim@estsetubal.ips.pt (MJC).

<sup>3</sup> ESTSetúbal, CDP2T, Instituto Politécnico de Setúbal, Setúbal, Portugal; maria.carmezim@estsetubal.ips.pt (MJC).

<sup>4</sup> Centre de Biophysique Moléculaire, CNRS, UPR 4301, Université d'Orléans, Rue Charles Sadron, 45071 Orléans CEDEX 2, France; csilla-noemi.garda-toth@cnrs-orleans.fr (CGT); sandra.meme@cnrs-orleans.fr (SM); sara.lacerda@cnrs-orleans.fr (SL).

<sup>5</sup> Departamento de Física de Materiales, Universidad Autonoma de Madrid, Avda. Francisco Tomás y Valiente 7, 28049 Madrid, Spain; daniel.jaque@uam.es (DJ).

<sup>6</sup> Departamento de Física Aplicada, Universidad Autonoma de Madrid, Avda. Francisco Tomás y Valiente 7, 28049 Madrid, Spain; celia.tsousa@uam.es (CTS).

\* Correspondence: pcampello@ctn.tecnico.ulisboa.pt (MPCC); lpereira@ctn.tecnico.ulisboa.pt (L.C.J.P.); Tel.: +351219946233 (MPCC); Tel.: +351219946259 (LCJP).

| Contents                                                                                | Page |
|-----------------------------------------------------------------------------------------|------|
| 1. UV-Vis spectrophotometry.....                                                        | S2   |
| 2. Attenuated Total Reflectance Fourier-Transform Infrared Spectroscopy (ATR-FTIR)..... | S3   |
| 3. Dynamic Light Scattering (DLS) and Zeta-Potential.....                               | S4   |
| 4. Powder X-ray diffraction (PXRD) .....                                                | S7   |
| 5. Transmission Electron Microscopy (TEM).....                                          | S8   |
| 6. Mössbauer Spectroscopy.....                                                          | S9   |
| 7. Magnetic Measurements.....                                                           | S12  |
| 8. Relaxitivity Studies.....                                                            | S14  |

## 1. UV-Vis Spectrophotometry

**Table S1.** Absorption peaks observed in the UV-Vis Spectra of the SPIONs

| Sample                      | Wavelength (nm) |     |
|-----------------------------|-----------------|-----|
| SP <sub>R/P</sub>           | 244             | 326 |
| SP <sub>R/P</sub> -DX       | 248             | 388 |
| SP <sub>R/P</sub> -DX-Au    | 390             | 543 |
| SP <sub>R/P</sub> -DX-Au-Gd | 394             | 544 |
| SP <sub>pH</sub>            | 251             | 320 |
| SP <sub>pH</sub> -DX        | 229             | 381 |
| SP <sub>pH</sub> -DX-Au     | 385             | 530 |
| SP <sub>pH</sub> -DX-Au-Gd  | 395             | 540 |
| Dextran                     | 275             |     |

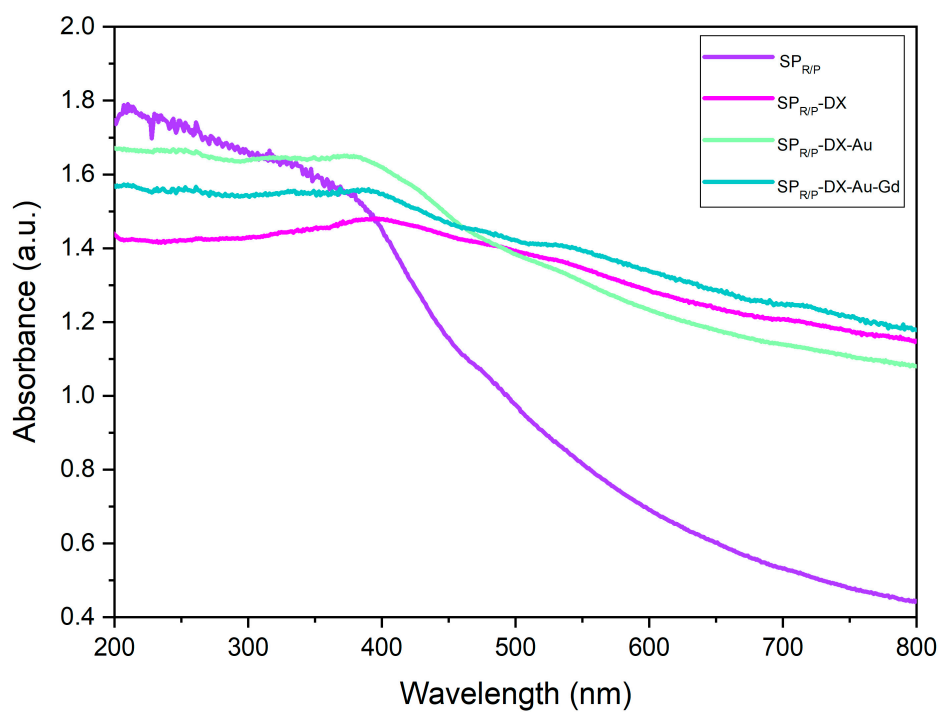

**Figure S1.** UV-Vis spectra of M<sub>R/P</sub> samples.

## 2. Attenuated Total Reflectance Fourier-Transform Infrared Spectroscopy (ATR-FTIR)

**Table S2.** Most Significant absorption bands observed in the FTIR Spectra of the SPIONs and Dextran.

| Sample                      | Wavenumber (cm <sup>-1</sup> ) |         |      |                  |         |      |        |         |
|-----------------------------|--------------------------------|---------|------|------------------|---------|------|--------|---------|
|                             | H <sub>2</sub> O               | Dextran |      | H <sub>2</sub> O | Dextran |      | SPIONs |         |
| SP <sub>R/P</sub>           | 3417                           |         |      | 1636             |         |      | 879    | 629 587 |
| SP <sub>R/P</sub> -Dx       | 3374                           | 2922    | 2849 | 1624             | 1152    | 1018 | 890    | 620 576 |
| SP <sub>R/P</sub> -Dx-Au    | 3418                           | 2918    | 2849 | 1634             | 1106    | 1017 | 890    | 627 573 |
| SP <sub>R/P</sub> -Dx-Au-Gd | 3420                           | 2920    | 2847 | 1635             | 1098    | 1025 |        | 625 590 |
| SP <sub>pH</sub>            | 3423                           |         |      | 1634             |         |      | 863    | 590     |
| SP <sub>pH</sub> -Dx        | 3422                           | 2923    | 2853 | 1637             | 1110    | 1016 | 866    | 617 579 |
| SP <sub>pH</sub> -Dx-Au     | 3422                           | 2922    | 2849 | 1637             | 1111    | 1013 | 871    | 617 581 |
| SP <sub>pH</sub> -Dx-Au-Gd  | 3419                           | 2928    | 2884 | 1634             | 1111    | 1051 | 840    | 618 590 |
| Dextran                     | 3404                           | 2920    | 2881 | 1643             | 1157    | 1013 |        |         |

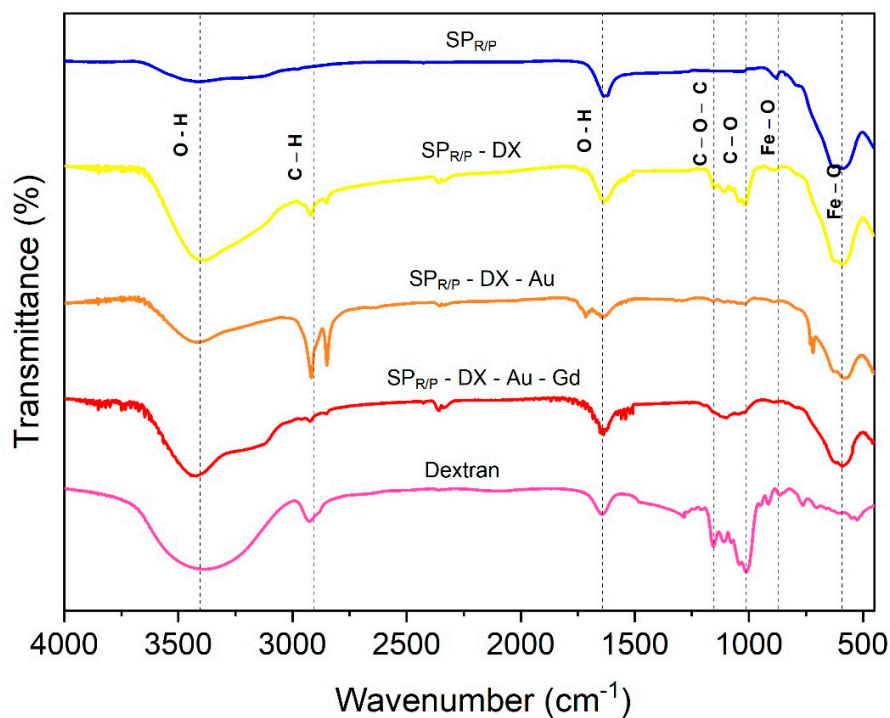

**Figure S2.** ATR-FTIR spectra of Dextran (pink) and M<sub>R/P</sub> samples, SP<sub>R/P</sub> (blue), SP<sub>R/P</sub>-Dx (yellow), SP<sub>R/P</sub>-Dx-Au (orange) SP<sub>R/P</sub>-Dx-Au-Gd (red).

### 3. Dynamic Light Scattering (DLS) and Zeta-Potential

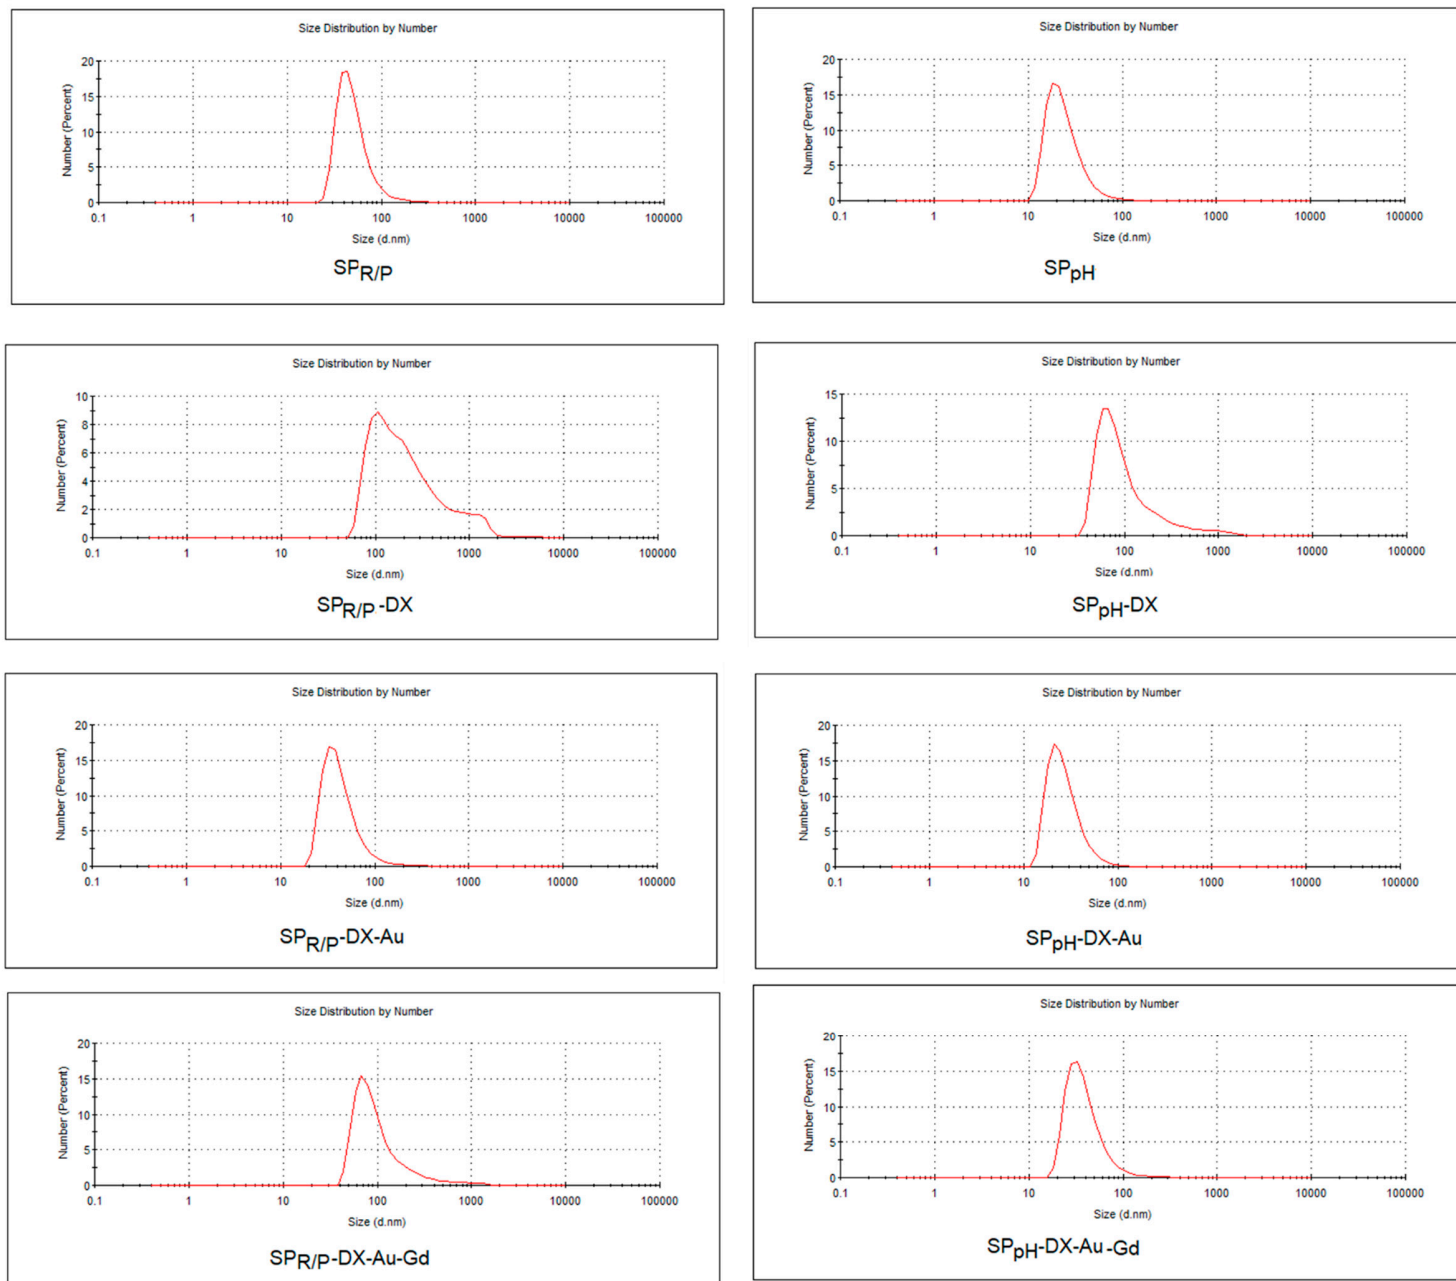

**Figure S3.** Histograms of the size distribution by number of all samples by DLS analysis.

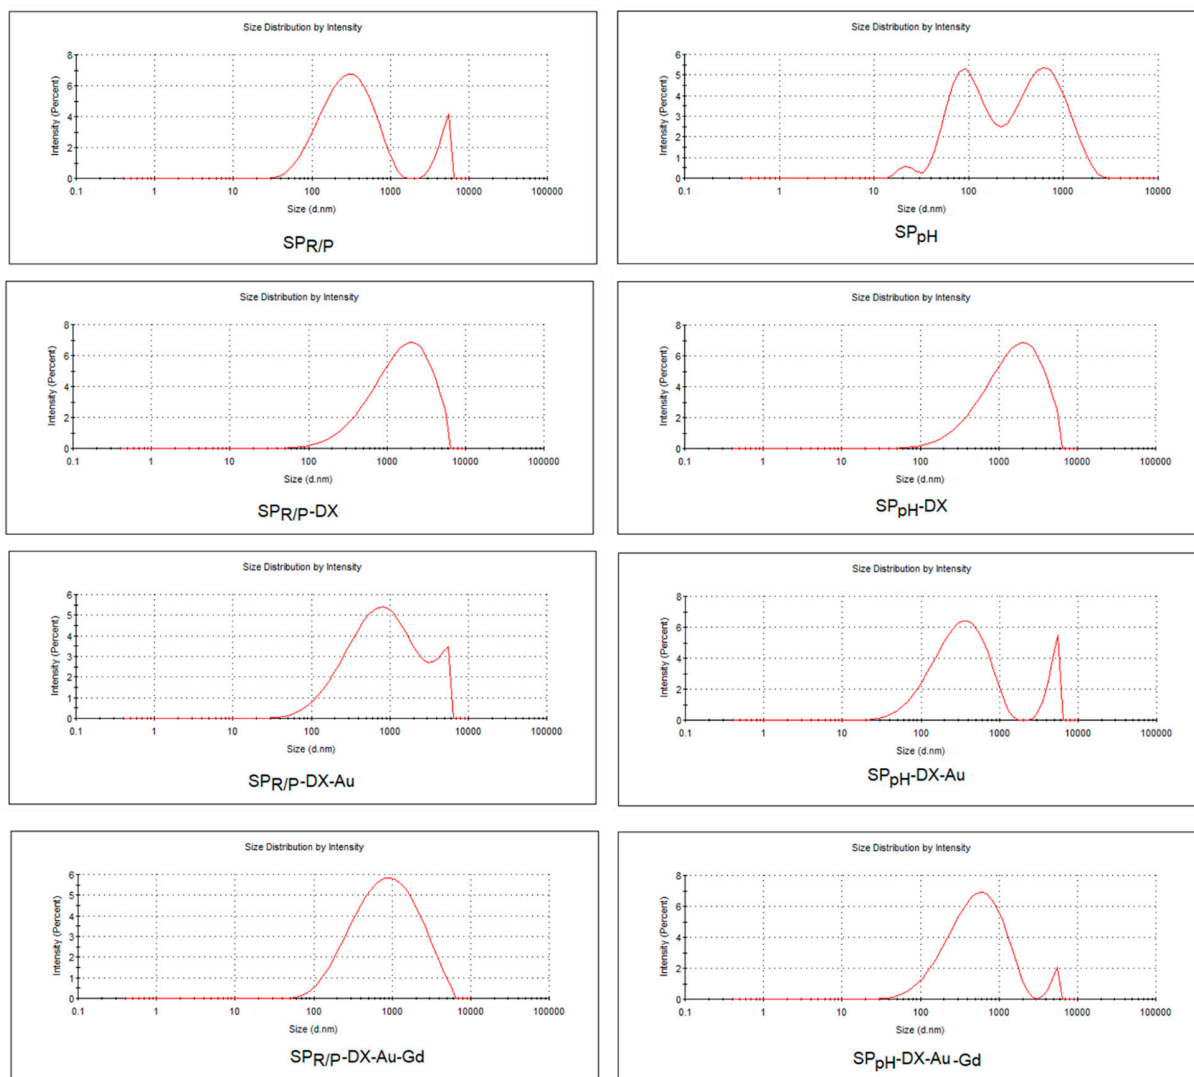

**Figure S4.** Histograms of the size distribution by intensity of all samples by DLS analysis.

**Table S3.** Hydrodynamic size values for all samples.

| Hydrodynamic size           |                     |              |              |             |
|-----------------------------|---------------------|--------------|--------------|-------------|
| Sample                      | Z Average<br>(d.nm) | INTENSITY    |              |             |
|                             |                     | Peak 1 (%)   | Peak 2 (%)   | Peak 3 (%)  |
| SP <sub>R/P</sub>           | 289.4               | 343.3 (88.6) | 4705 (11.4)  |             |
|                             | 317.6               | 308.6 (82.8) | 4640 (17.2)  |             |
| SP <sub>R/P</sub> -Dx       | 1087                | 905.9 (64.9) | 4215 (35.1)  |             |
|                             | 1364                | 896.9 (53.0) | 3974 (47.0)  |             |
| SP <sub>R/P</sub> -Dx-Au    | 628.6               | 947.9 (85.3) | 4321 (14.7)  |             |
|                             | 581.3               | 1193 (100)   |              |             |
| SP <sub>R/P</sub> -Dx-Au-Gd | 575.8               | 1191 (100)   |              |             |
|                             | 570.6               | 972.5 (100)  |              |             |
| SP <sub>pH</sub>            | 166.6               | 700 (54.6)   | 107.2 (43.2) | 23.27 (2.2) |
|                             | 159.4               | 414.2 (90.4) | 37.87 (9.6)  |             |
| SP <sub>pH</sub> -Dx        | 999.3               | 947.8 (65.6) | 3985 (34.4)  |             |
|                             | 1024                | 1024 (65.5)  | 3761 (34.5)  |             |
| SP <sub>pH</sub> -Dx-Au     | 333.0               | 379.9 (86.2) | 4795 (13.8)  |             |
|                             | 316.3               | 334.3 (86.8) | 4885 (13.2)  |             |
| SP <sub>pH</sub> -Dx-Au-Gd  | 426.9               | 626.4 (96.0) | 5047 (4.0)   |             |
|                             | 422.1               | 568.1 (94.1) | 4971 (5.9)   |             |

#### 4. Powder X-ray diffraction (PXRD)

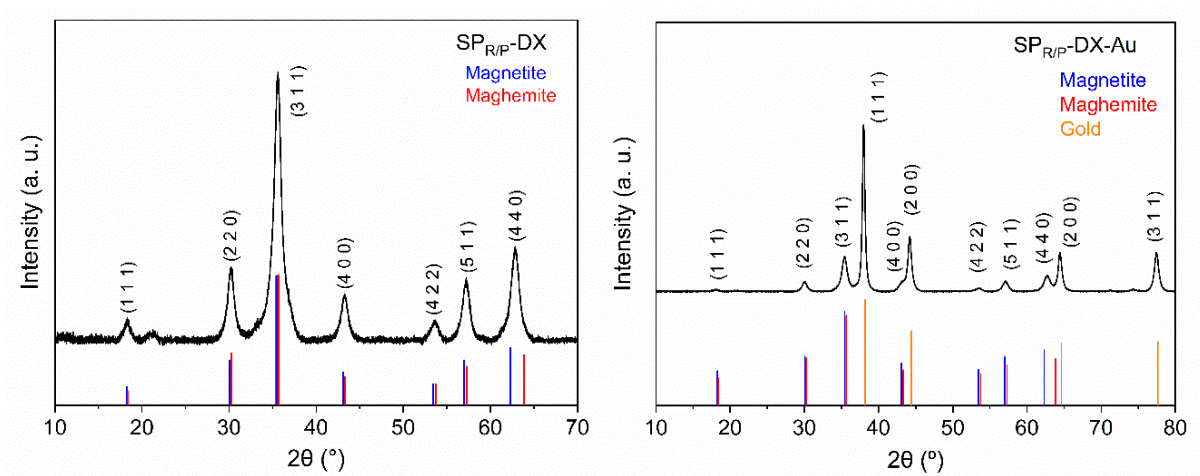

**Figure S5.** Powder diffractogram of coated samples  $SP_{R/P}\text{-Dx}$  (left) and  $SP_{R/P}\text{-Dx-Au}$  (right).

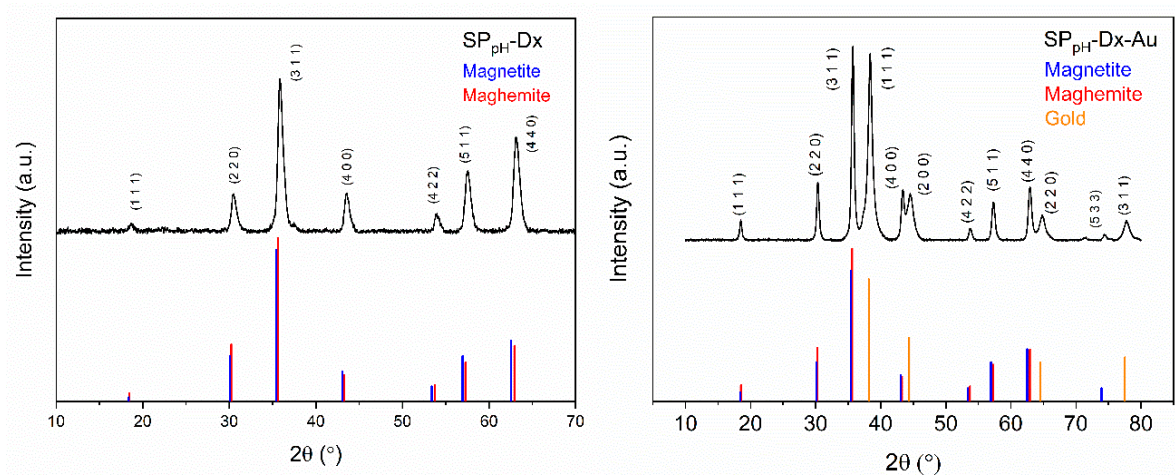

**Figure S6.** Powder diffractogram of coated samples  $SP_{pH}\text{-Dx}$  (left) and  $SP_{pH}\text{-Dx-Au}$  (right).



## 5. Transmission Electron Microscopy (TEM)

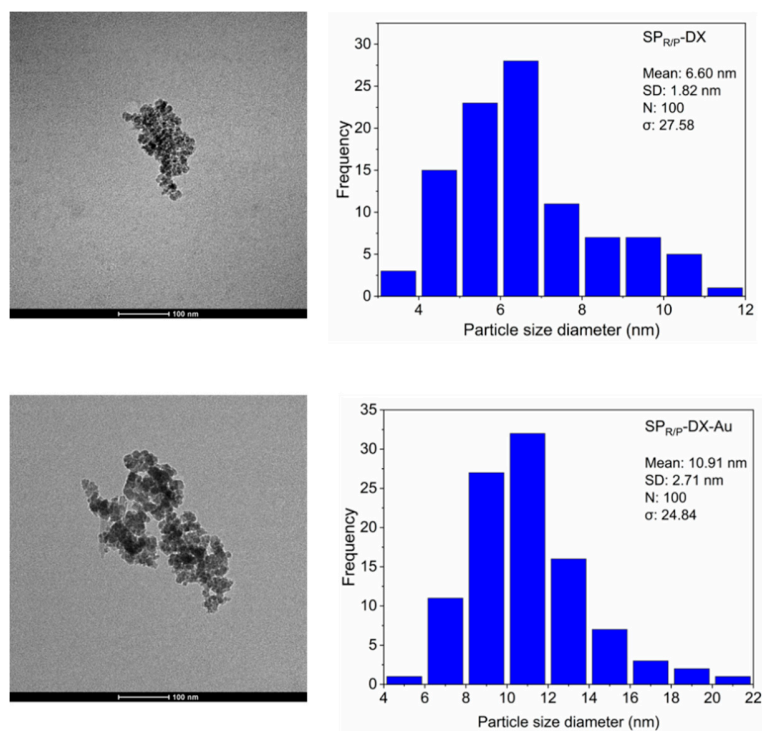

**Figure S7.** Transmission electron microscopy images of the SPIONs respective size histogram: Top:  $SP_{R/P}\text{-DX}$ ; bottom:  $SP_{R/P}\text{-DX-Au}$ .

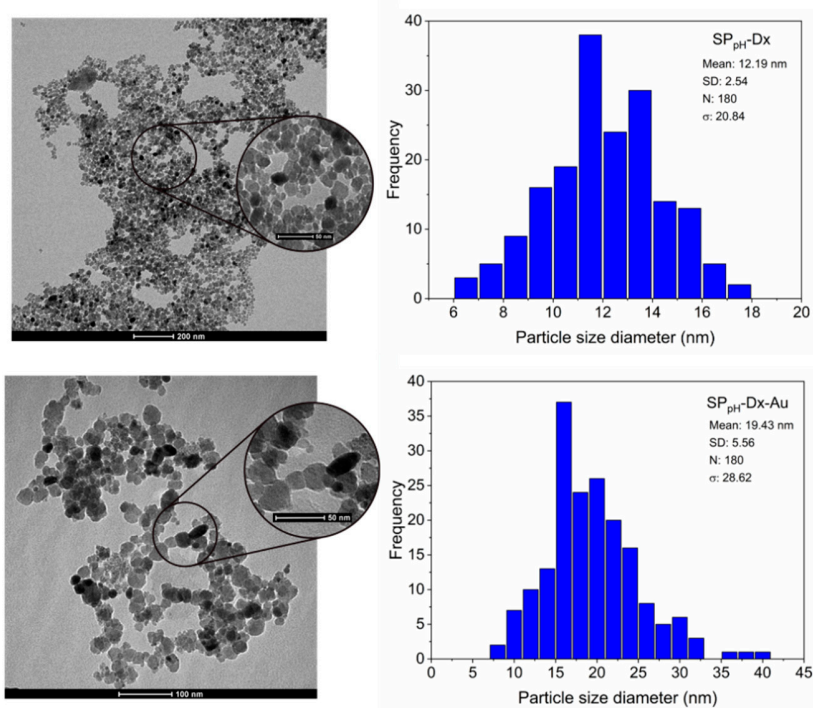

**Figure S8.** Transmission electron microscopy images of the SPIONs respective size histogram: Top:  $SP_{pH}\text{-Dx}$ ; bottom:  $SP_{pH}\text{-Dx-Au}$ .



## 6. Mössbauer Spectroscopy

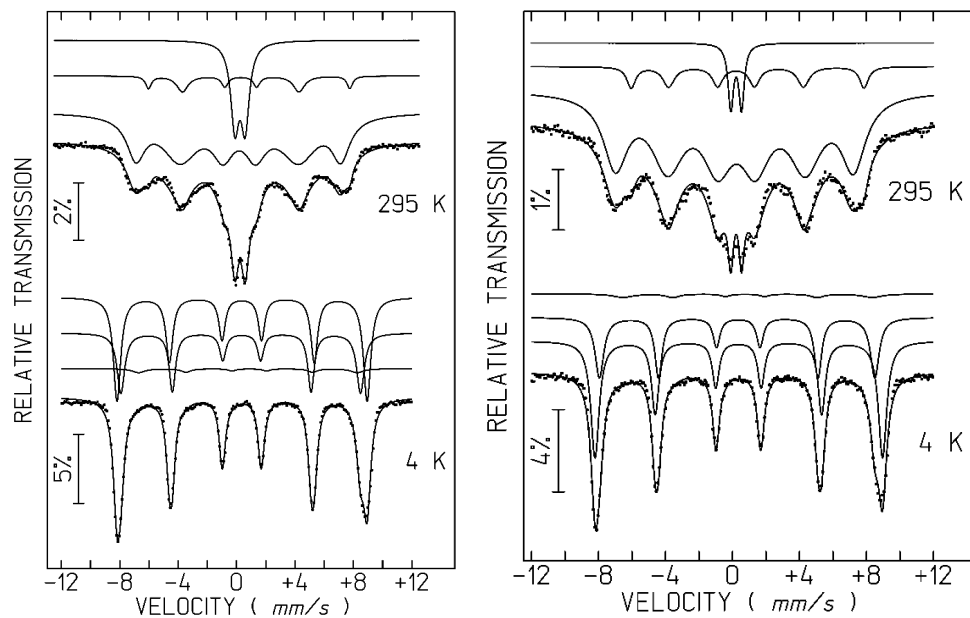

**Figure S9.** Mössbauer spectra of  $SP_{R/P}$  (left) and  $SP_{R/P}$ -Dx-Au (right) taken at different temperatures. The lines over the experimental points are the calculated curves. The estimated parameters are collected in Table S3.

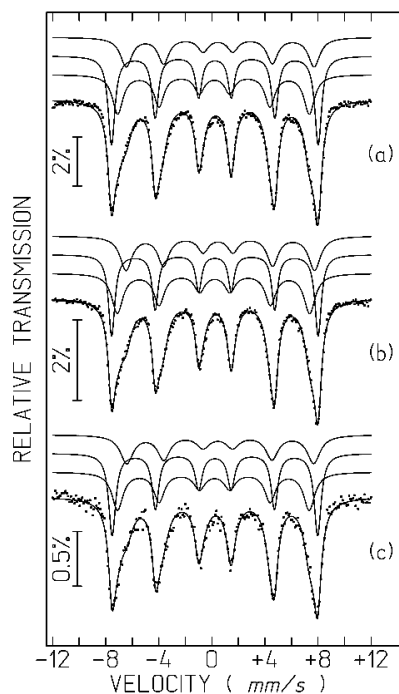

**Figure S10.** Room temperature Mössbauer spectra of (a)  $SP_{pH}$ -Dx (b)  $SP_{pH}$ -Dx-Au and (c)  $SP_{pH}$ -Dx-Au-Gd samples. Calculated lines on the experimental points are the sum of three sextets (see Table S3).

**Table S4.** Estimated parameters from the Mössbauer spectra of selected SPIONs samples at room temperature and at 4 K.

| Sample                        | IS mm/s | $\epsilon$<br>mm/s | $B_{hf}$<br>tesla | I (%) | Fe state                                                                                             | Fe in Fe <sub>3</sub> O <sub>4</sub> |
|-------------------------------|---------|--------------------|-------------------|-------|------------------------------------------------------------------------------------------------------|--------------------------------------|
| <b>SP<sub>R/P</sub></b>       | 0.30    | -0.12              | 43.5              | 76%   | Fe <sup>3+</sup> $\gamma$ -Fe <sub>2</sub> O <sub>3</sub> , Fe <sub>3</sub> O <sub>4</sub>           | <b>11%</b>                           |
| <b>295 K</b>                  | 0.35    | 0.65               | -                 | 16%   | Fe <sup>3+</sup> in the smallest NPs                                                                 |                                      |
|                               | 0.69    | 0.66               | 42.7              | 8%    | Fe <sup>2.5+</sup> CN = 6 Fe <sub>3</sub> O <sub>4</sub>                                             |                                      |
|                               |         |                    |                   |       |                                                                                                      |                                      |
| <b>4 K</b>                    | 0.43    | -0.07              | 50.9              | 39%   | Fe <sup>3+</sup> CN=4 $\gamma$ -Fe <sub>2</sub> O <sub>3</sub> ,<br>Fe <sub>3</sub> O <sub>4</sub>   |                                      |
|                               | 048     | 0.02               | 53.1              | 57%   | Fe <sup>3+</sup> CN = 6 $\gamma$ -Fe <sub>2</sub> O <sub>3</sub> ,<br>Fe <sub>3</sub> O <sub>4</sub> |                                      |
|                               | 0.93    | -0.10              | 46.4              | 3.8%  | Fe <sup>2+</sup> CN = 6 Fe <sub>3</sub> O <sub>4</sub>                                               |                                      |
|                               |         |                    |                   |       |                                                                                                      |                                      |
| <b>SP<sub>R/P</sub>-Dx</b>    | 0.29    | -0.09              | 43.4              | 75%   | Fe <sup>3+</sup> $\gamma$ -Fe <sub>2</sub> O <sub>3</sub> , Fe <sub>3</sub> O <sub>4</sub>           | <b>11%</b>                           |
| <b>295 K</b>                  | 0.35    | 0.69               | -                 | 17%   | Fe <sup>3+</sup> in the smallest NPs                                                                 |                                      |
|                               | 0.68    | 0.63               | 42.1              | 8%    | Fe <sup>2.5+</sup> CN = 6 Fe <sub>3</sub> O <sub>4</sub>                                             |                                      |
|                               |         |                    |                   |       |                                                                                                      |                                      |
| <b>4 K</b>                    | 0.42    | -0.08              | 50.9              | 38%   | Fe <sup>3+</sup> CN=4 $\gamma$ -Fe <sub>2</sub> O <sub>3</sub> ,<br>Fe <sub>3</sub> O <sub>4</sub>   |                                      |
|                               | 048     | 0.01               | 53.0              | 58%   | Fe <sup>3+</sup> CN = 6 $\gamma$ -Fe <sub>2</sub> O <sub>3</sub> ,<br>Fe <sub>3</sub> O <sub>4</sub> |                                      |
|                               | 0.93    | -0.45              | 46.8              | 3.8%  | Fe <sup>2+</sup> CN = 6 Fe <sub>3</sub> O <sub>4</sub>                                               |                                      |
|                               |         |                    |                   |       |                                                                                                      |                                      |
| <b>SP<sub>R/P</sub>-Dx-Au</b> | 0.29    | -0.12              | 44.1              | 86%   | Fe <sup>3+</sup> $\gamma$ -Fe <sub>2</sub> O <sub>3</sub> , Fe <sub>3</sub> O <sub>4</sub>           | <b>13%</b>                           |
| <b>295 K</b>                  | 0.33    | 0.64               | -                 | 5%    | Fe <sup>3+</sup> in the smallest NPs                                                                 |                                      |
|                               | 0.67    | 0.69               | 43.1              | 9%    | Fe <sup>2.5+</sup> CN = 6 Fe <sub>3</sub> O <sub>4</sub>                                             |                                      |
|                               |         |                    |                   |       |                                                                                                      |                                      |
| <b>4 K</b>                    | 0.43    | -0.07              | 51.0              | 38%   | Fe <sup>3+</sup> CN=4 $\gamma$ -Fe <sub>2</sub> O <sub>3</sub> ,<br>Fe <sub>3</sub> O <sub>4</sub>   |                                      |
|                               | 048     | 0.02               | 53.3              | 58%   | Fe <sup>3+</sup> CN = 6 $\gamma$ -Fe <sub>2</sub> O <sub>3</sub> ,<br>Fe <sub>3</sub> O <sub>4</sub> |                                      |
|                               | 0.94    | 0.23               | 46.5              | 4.4%  | Fe <sup>2+</sup> CN = 6 Fe <sub>3</sub> O <sub>4</sub>                                               |                                      |
|                               |         |                    |                   |       |                                                                                                      |                                      |
| <b>SP<sub>PH</sub></b>        | 0.26    | -0.09              | 44.3              | 32%   | Fe <sup>3+</sup> CN=4 $\gamma$ -Fe <sub>2</sub> O <sub>3</sub> ,<br>Fe <sub>3</sub> O <sub>4</sub>   | <b>33%</b>                           |
| <b>295 K</b>                  | 0.33    | 0.01               | 48.6              | 47%   | Fe <sup>3+</sup> CN = 6 $\gamma$ -Fe <sub>2</sub> O <sub>3</sub>                                     |                                      |
|                               | 0.66    | 0.26               | 42.8              | 21%   | Fe <sup>2.5+</sup> CN = 6 Fe <sub>3</sub> O <sub>4</sub>                                             |                                      |
|                               |         |                    |                   |       |                                                                                                      |                                      |
| <b>4 K</b>                    | 0.43    | 0.00               | 51.6              | 34%   | Fe <sup>3+</sup> CN=4 $\gamma$ -Fe <sub>2</sub> O <sub>3</sub> ,<br>Fe <sub>3</sub> O <sub>4</sub>   |                                      |
|                               | 0.51    | -0.03              | 53.6              | 56%   | Fe <sup>3+</sup> CN = 6 $\gamma$ -Fe <sub>2</sub> O <sub>3</sub> ,<br>Fe <sub>3</sub> O <sub>4</sub> |                                      |
|                               | 0.94    | -0.31              | 46.9              | 11%   | Fe <sup>2+</sup> CN = 6 Fe <sub>3</sub> O <sub>4</sub>                                               |                                      |
|                               |         |                    |                   |       |                                                                                                      |                                      |

|                                 |             |             |             |           |                                                                                                   |            |
|---------------------------------|-------------|-------------|-------------|-----------|---------------------------------------------------------------------------------------------------|------------|
| <b>SP<sub>pH</sub>-Dx</b>       | 0.27        | -0.08       | 44.8        | 31        | Fe <sup>3+</sup> CN=4 $\gamma$ Fe <sub>2</sub> O <sub>3</sub> ,<br>Fe <sub>3</sub> O <sub>4</sub> | <b>39%</b> |
| <b>295 K</b>                    | 0.34        | -0.01       | 48.3        | 43        | Fe <sup>3+</sup> CN = 6 $\gamma$ Fe <sub>2</sub> O <sub>3</sub>                                   |            |
|                                 | 0.65        | 0.17        | 43.9        | 26        | Fe <sup>2.5+</sup> CN = 6 Fe <sub>3</sub> O <sub>4</sub>                                          |            |
|                                 |             |             |             |           |                                                                                                   |            |
| <b>SP<sub>pH</sub>-Dx-Au</b>    | 0.28        | -0.10       | 44.7        | 33        | Fe <sup>3+</sup> CN=4 $\gamma$ Fe <sub>2</sub> O <sub>3</sub> ,<br>Fe <sub>3</sub> O <sub>4</sub> | <b>45%</b> |
| <b>295 K</b>                    | 0.34        | -0.01       | 48.3        | 37        | Fe <sup>3+</sup> CN = 6 $\gamma$ Fe <sub>2</sub> O <sub>3</sub>                                   |            |
|                                 | 0.66        | 0.17        | 44.1        | 30        | Fe <sup>2.5+</sup> CN = 6 Fe <sub>3</sub> O <sub>4</sub>                                          |            |
|                                 |             |             |             |           |                                                                                                   |            |
| <b>SP<sub>pH</sub>-Dx-Au-Gd</b> | 0.27        | -0.10       | 45.0        | 34        | Fe <sup>3+</sup> CN=4 $\gamma$ Fe <sub>2</sub> O <sub>3</sub> ,<br>Fe <sub>3</sub> O <sub>4</sub> | <b>44%</b> |
| <b>295 K</b>                    | 0.34        | 0.00        | 48.1        | 37        | Fe <sup>3+</sup> CN = 6 $\gamma$ Fe <sub>2</sub> O <sub>3</sub>                                   |            |
|                                 | <b>0.65</b> | <b>0.19</b> | <b>43.9</b> | <b>29</b> | <b>Fe<sup>2.5+</sup> CN = 6 Fe<sub>3</sub>O<sub>4</sub></b>                                       |            |

IS isomer shift relative to metallic  $\alpha$ -Fe at 298 K;  $\epsilon = (e^2QV_{zz}/4) (3\cos^2\theta - 1)$  quadrupole shift,  $B_{hf}$  magnetic hyperfine field. I relative area. CN coordination number. Estimated errors  $\leq 0.02$  mm/s for IS,  $\epsilon$ ,  $\Gamma$ ,  $< 0.3$  T for  $B_{hf}$  and  $< 2\%$  for I.

## 7. Magnetization Measurements

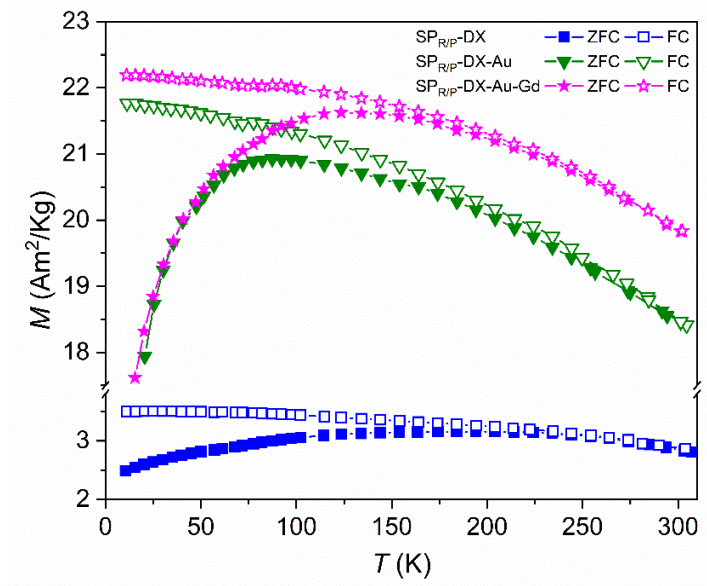

**Figure S11.** Temperature dependence of the zero-field cooling (ZFC) and field cooling (FC) magnetization for samples,  $SP_{R/P}$ -DX, at 10mT (squares),  $SP_{R/P}$ -DX-Au, at 50 mT (down triangles) and  $SP_{R/P}$ -DX-Au-Gd, at 50 mT (stars).

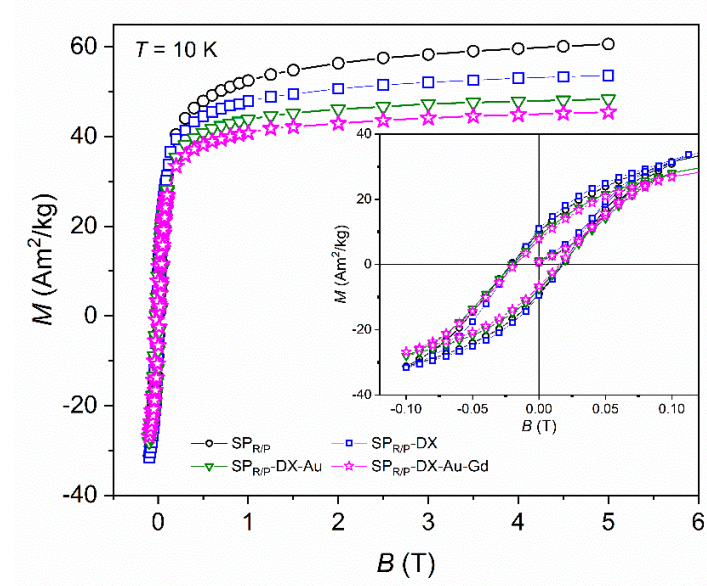

**Figure S12.** Magnetic field ( $B$ ) dependence of magnetization ( $M$ ) at 10 K for  $SP_{R/P}$ -based samples,  $SP_{R/P}$  (circles),  $SP_{R/P}$ -Dx (squares),  $SP_{R/P}$ -Dx-Au (down triangles) and  $SP_{R/P}$ -Dx-Au-Gd (stars).

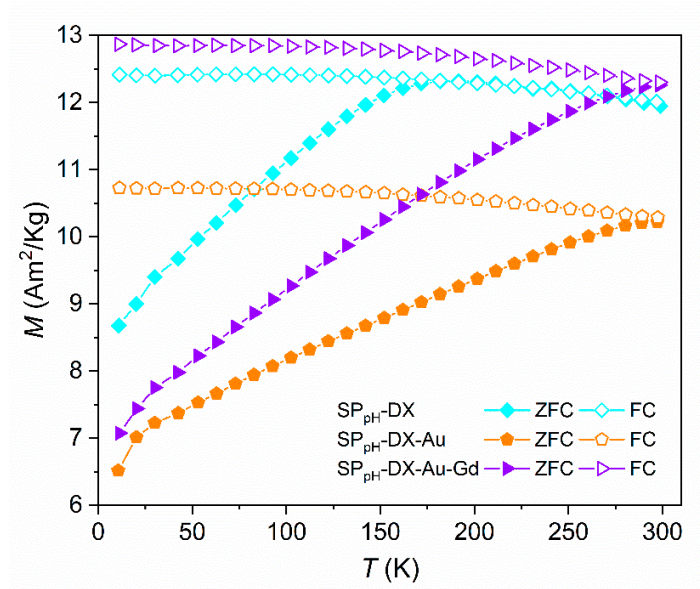

**Figure S13.** Temperature dependence of the zero-field cooling (ZFC) and field cooling (FC) magnetization (at 10 mT) for SP<sub>pH</sub>-based samples, SP<sub>pH</sub>-DX (diamonds), SP<sub>pH</sub>-DX-Au (pentagons), and SP<sub>pH</sub>-DX-Au-Gd (lying triangles).

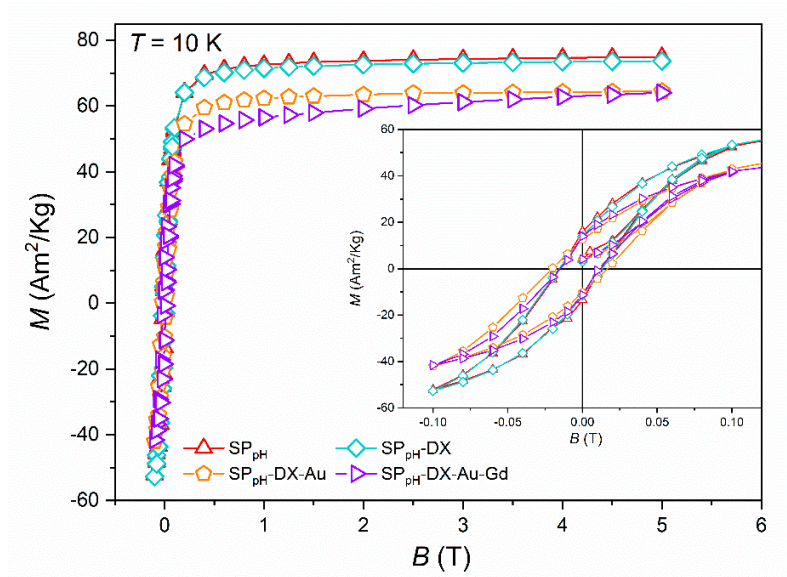

**Figure S14.** Magnetic field ( $B$ ) dependence of magnetization ( $M$ ) at 10 K for SP<sub>pH</sub>-based samples, SP<sub>pH</sub> (triangles), SP<sub>pH</sub>-DX (diamonds), SP<sub>pH</sub>-DX-Au (pentagons), and SP<sub>pH</sub>-DX-Au-Gd (lying triangles).

## 8. Relaxativity Studies

**Table S5.** Longitudinal ( $r_1$ ) and transverse ( $r_2$ ) relaxivity values determined for selected samples at 300 MHz, 7 T, room temperature, Fe and Gd concentrations, and  $r_2/r_1$  ratios.

| Sample                      | 7 T (300 MHz, room temp) / mM <sup>-1</sup> s <sup>-1</sup> |            |           | Concentration (measured by ICP) / M |                      | Relaxivities considering Fe and Gd contributions, 7 T |                 |           |
|-----------------------------|-------------------------------------------------------------|------------|-----------|-------------------------------------|----------------------|-------------------------------------------------------|-----------------|-----------|
|                             | $r_1$ (Gd)                                                  | $r_2$ (Fe) | $r_2/r_1$ | [Fe]                                | [Gd]                 | $r_1$ (Gd + Fe)                                       | $r_2$ (Fe + Gd) | $r_2/r_1$ |
| SP <sub>R/P</sub>           | --                                                          | 122        | ---       | 1.2x10 <sup>-3</sup>                | ---                  | 0.4                                                   | 122             | 340       |
| SP <sub>R/P</sub> -Dx-Au-Gd | 5                                                           | 10         | 2         | 3.5x10 <sup>-4</sup>                | 3.3x10 <sup>-5</sup> | 0.4                                                   | 9               | 23        |
| SP <sub>pH</sub>            | --                                                          | 186        | ---       | 4.6x10 <sup>-4</sup>                | ---                  | 0.8                                                   | 186             | 240       |
| SP <sub>pH</sub> -Dx-Au-Gd  | 55                                                          | 56         | 1         | 7.1x10 <sup>-4</sup>                | 2.6x10 <sup>-6</sup> | 0.2                                                   | 56              | 282       |

**Table S6.** Longitudinal ( $r_1$ ) and transverse ( $r_2$ ) relaxivity values determined for selected samples at 300 MHz, 1.41 T, room temperature, Fe and Gd concentrations, and  $r_2/r_1$  ratios.

| Sample                      | 1.41 T (60 MHz, 25°C) / mM <sup>-1</sup> s <sup>-1</sup> |            |           | Concentration (measured by ICP) / M |                      | Relaxivities considering Fe and Gd contributions, 1.41 T |                 |           |
|-----------------------------|----------------------------------------------------------|------------|-----------|-------------------------------------|----------------------|----------------------------------------------------------|-----------------|-----------|
|                             | $r_1$ (Gd)                                               | $r_2$ (Fe) | $r_2/r_1$ | [Fe]                                | [Gd]                 | $r_1$ (Gd + Fe)                                          | $r_2$ (Fe + Gd) | $r_2/r_1$ |
| SP <sub>R/P</sub>           | ---                                                      | 61.8       | ---       | 6.5x10 <sup>-4</sup>                | ---                  | 1.8                                                      | 62.0            | 35        |
| SP <sub>R/P</sub> -Dx-Au-Gd | 5.5                                                      | 7.7        | 1.4       | 2.7x10 <sup>-4</sup>                | 1.3x10 <sup>-5</sup> | 0.3                                                      | 7.7             | 29        |
| SP <sub>pH</sub>            | ---                                                      | 169.7      | ---       | 1.6x10 <sup>-4</sup>                | ---                  | 7.7                                                      | 169.7           | 22        |
| SP <sub>pH</sub> -Dx-Au-Gd  | 23.2                                                     | 11.7       | 0.5       | 5.3x10 <sup>-4</sup>                | 2.2x10 <sup>-6</sup> | 0.1                                                      | 11.8            | 123       |
